# Supplementary material
Source: publisher figshare collection journal article supplement (https://tandf.figshare.com/articles/dataset/_/8848808)
Supplement: Supplementary file 1 [file 1]

*Appendix B1. Descriptive statistics per certification*

| <b>Summary statistics</b>                 | <b>CAFE<br/>(n=81)</b> | <b>AAA<br/>(n=141)</b> | <b>RA/AAA<br/>(n=79)</b> | <b>4C (n=74)</b> | <b>Controls<br/>(n=237)</b> |
|-------------------------------------------|------------------------|------------------------|--------------------------|------------------|-----------------------------|
| <i>Household characteristics</i>          |                        |                        |                          |                  |                             |
| Female household head (dummy)             | 0.52                   | 0.21                   | 0.25                     | 0                | 0.27                        |
| Age of household head (years)             | 53.79                  | 51.91                  | 55.76                    | 56.62            | 53.48                       |
| Years of schooling of household head      | 5.67                   | 4.47                   | 3.77                     | 5.04             | 4.86                        |
| Household size (number of people)         | 3.23                   | 3.3                    | 2.78                     | 3.35             | 3.28                        |
| Full tenure (dummy)                       | 0.96                   | 0.94                   | 0.94                     | 0.93             | 0.95                        |
| Distance to market (minutes)              | 46.81                  | 46.38                  | 48.73                    | 33.88            | 44.45                       |
| <i>Farm characteristics</i>               |                        |                        |                          |                  |                             |
| Total farm area in hectares (ha)          | 5.68                   | 4.09                   | 4.65                     | 2.88             | 4.70                        |
| Coffee area (ha)                          | 3.24                   | 2.00                   | 2.63                     | 2.4              | 3.00                        |
| Farm altitude (meters)                    | 1,709.81               | 1,739.16               | 1,694.30                 | 1,776.27         | 1,687.86                    |
| Productivity 2015 (kg dried parchment/ha) | 1,635.46               | 1,438.02               | 1,451.90                 | 1,668.49         | 1,604.12                    |
| Share of low quality coffee               | 0.29                   | 0.35                   | 0.39                     | 0.11             | 0.25                        |

*Source:* Authors' elaboration using survey data.

## Appendix B2: Descriptive statistics per cooperative

| <b>Summary statistics (means)</b>                         | <b>A (n=319)</b> | <b>B (n=293)</b> |
|-----------------------------------------------------------|------------------|------------------|
| <i>Household characteristics</i>                          |                  |                  |
| Female household head (dummy)                             | 0.32             | 0.17             |
| Age of household head (years)                             | 51               | 56               |
| Years of schooling of household head                      | 4.80             | 4.70             |
| Household size (number of people)                         | 3.10             | 3.30             |
| Full tenure (dummy)                                       | 0.92             | 0.96             |
| Distance to output market (minutes)                       | 51.88            | 36.43            |
| <i>Farm characteristics</i>                               |                  |                  |
| Total farm area (hectares)                                | 5.20             | 3.70             |
| Coffee area (hectares)                                    | 2.70             | 2.60             |
| Farm altitude (m)                                         | 1,713.41         | 1,714.33         |
| Productivity 2015 (yields per hectare, kg)                | 1,440.30         | 1,686.40         |
| Share of low quality coffee                               | 0.43             | 0.13             |
| Share of income from coffee                               | 0.92             | 0.89             |
| <i>Household income and poverty</i>                       |                  |                  |
| Coffee gross margins per farm                             | 1,728.74         | 3,657.97         |
| Coffee gross margins per hectare                          | 615.45           | 1,177.84         |
| Revenue all sources per farm                              | 7,960.92         | 10,174.35        |
| Poverty Probability Index (PPI)                           | 44.11            | 46.02            |
| PPI probability of living under the national poverty line | 30%              | 18%              |

*Notes:* Exchange rate used from Colombian pesos to US dollars: 2,734 (average exchange rate for the year 2015).
