# Supplementary material
Source: publisher figshare collection journal article supplement (https://tandf.figshare.com/articles/dataset/_/8848808)
Supplement: Supplementary file 2 [file 1]

Appendix C. Economic impact on certified farmers vs. controls in USD (2015).

| Economic impact variables         | C.A.F.E. Practices (n=81) |         | AAA (n=141)                |                            | 4C (n=74)      |               | RA/AAA (n=79) |           | C (n=237) |
|-----------------------------------|---------------------------|---------|----------------------------|----------------------------|----------------|---------------|---------------|-----------|-----------|
|                                   | OLS                       | ATET    | OLS                        | ATET                       | OLS            | ATET          | OLS           | ATET      | Mean      |
| <i>Income indicators</i>          |                           |         |                            |                            |                |               |               |           |           |
| Coffee sales revenue per farm     | -381.84                   | -302.75 | -3,511.62***<br>(1,175.82) | -3,086.3***<br>(971.61)    | 36.00          | -108.53       | -1,219.67     | -1,365.54 | 9,664.57  |
| Coffee sales revenue per hectare  | 219.14                    | 78.73   | -284.71                    | -231.98                    | 291.22         | 67.57         | -110.60       | -71.30    | 3,140.89  |
| Coffee gross profit per farm      | 313.32                    | 109.91  | -1,250.13                  | -986.29                    | 614.00         | -224.73       | 27.44         | 198.36    | 2,905.11  |
| Coffee gross profit per hectare   | 303.73                    | 228.22  | -65.6                      | -85.69                     | 242.92         | -24.36        | 38.46         | 19.7      | 816.20    |
| Coffee gross profit per carga (a) | 9.61                      | 25.83   | -1.99                      | 4.49                       | 22.97          | 3.44          | 24.04         | 18.42     | 2.55      |
| Additional income                 | -519.28* (282.19)         | -592.15 | -279.77                    | -336.19                    | -201.87        | -385.38       | -141.52       | -24.24    | 785.19    |
| Household income                  | -901.13                   | -894.90 | -3,791.39***<br>(1,234.29) | -3,422.48***<br>(1,079.47) | -518.87        | -165.86       | -1,361.18     | -1,389.78 | 10,449.76 |
| <i>Social outcomes</i>            |                           |         |                            |                            |                |               |               |           |           |
| Reported savings (dummy)          | -0.00                     | 0       | -0.01                      | 0.04                       | 0.02           | -.02          | 0.04          | 0.03      | 0.15      |
| Reported food shortage (dummy)    | 0.01                      | 0.01    | 0.02                       | 0.03                       | 0.10*** (0.04) | 0.1*** (0.03) | 0.01          | 0.01      | 0.00      |
| Poverty Probability Index (PPI)   | -1.01                     | -1.57   | -1.55* (0.81)              | -1.61* (0.94)              | 0.02           | 0.04          | 0.25          | 1.08      | 45.52     |

Notes: Estimates of the Ordinary Least Squares regression (OLS) and the Average Treatment Effect on the Treated (ATET) are displayed for all the analysed VSS. \*\*\*p < 0.01; \*\*p < 0.05; \*p < 0.1. Robust standard errors displayed in parenthesis for significant coefficients. (a) 1 carga = 125 kg.
