# Supplementary material
Source: publisher figshare collection journal article supplement (https://tandf.figshare.com/articles/dataset/_/8848808)
Supplement: Supplementary file 3 [file 1]

Archive with 5 entries (5 files):
- fjds_a_1632433_sm0680.pdf
- fjds_a_1632433_sm0677.pdf
- fjds_a_1632433_sm0672.pdf
- fjds_a_1632433_sm0668.pdf
- fjds_a_1632433_sm0658.pdf
