# Supplementary material
Source: publisher figshare collection journal article supplement (https://tandf.figshare.com/articles/dataset/_/8848808)
Supplement: Supplementary file 3 [file 1 › fjds_a_1632433_sm0668.pdf]

Appendix D1. *Impact pathways certified farmers vs. controls in USD (2015)*

| Impact pathway variables           | C.A.F.E. (n=81) |              | AAA (n=141) |                       | 4C (n=74) |                 | RA/AAA (n=79) |                     | C (n=237) |
|------------------------------------|-----------------|--------------|-------------|-----------------------|-----------|-----------------|---------------|---------------------|-----------|
|                                    | Mean            | ATET         | Mean        | ATET                  | Mean      | ATET            | Mean          | ATET                | Mean      |
| <i>Price premiums</i>              |                 |              |             |                       |           |                 |               |                     |           |
| Coffee sales revenue per carga (a) | 247.79          | 7.88* (4.63) | 243.50      | 6.79                  | 258.03    | 16.49*** (3.92) | 239.25        | 0.77                | 242.24    |
| <i>Productivity</i>                |                 |              |             |                       |           |                 |               |                     |           |
| Production 2015                    | 40.96           | -0.96        | 22.56       | -13.84*** (4.38)      | 33.11     | -2.88           | 31.86         | -5.88               | 39.18     |
| Yields per hectare (in kg)         | 1,635.46        | -6.63        | 1,438.02    | -155.42               | 1625.35   | -95.58          | 1,451.90      | -20.95              | 1,604.12  |
| <i>Costs of production</i>         |                 |              |             |                       |           |                 |               |                     |           |
| Agricultural inputs (per farm)     | 1,444.77        | -125.31      | 897.65      | -454.16** (199.49)    | 1,132.39  | 66.42           | 971.20        | -526.44** (247.50)  | 1,434.72  |
| Labour (per farm)                  | 5,022.33        | -376.36      | 2,950.76    | -1,619.96*** (574.39) | 4,021.58  | -60.12          | 4,231.34      | -1,079.28           | 5,150.94  |
| Other                              | 210.69          | 59.7         | 97.76       | -25.09                | 164.53    | 52.97           | 159.14        | 38.02               | 136.92    |
| Total per farm                     | 6,723.61        | -412.66      | 3,991.18    | -2,100.01*** (781.70) | 5,407.52  | 116.2           | 5,381.10      | -1,563.90* (880.74) | 6,759.46  |
| Total per hectare                  | 2,236.41        | -149.49      | 2,001.79    | -146.30               | 2,237.34  | 91.93           | 2,071.16      | -91.00              | 2,324.69  |
| <i>Access to credit</i>            |                 |              |             |                       |           |                 |               |                     |           |
| Received formal credit (dummy)     | 0.54            | 0.15*        | 0.42        | -0.03                 | 0.44      | 0.09            | 0.36          | 0.04                | 0.43      |
| Received informal credit (dummy)   | 0.17            | -0.01        | 0.14        | -0.02                 | 0.24      | 0.01            | 0.13          | -0.05               | 0.16      |

Notes: \*\*\*p < 0.01; \*\*p < 0.05; \*p < 0.1. Robust standard errors displayed in parenthesis for significant coefficients. (a) 1 carga = 125 kg.

Appendix D2. *Underlying practices certified farmers vs. controls in USD (2015)*

| Underlying practices                           | C.A.F.E. (n=81) |               | AAA (n=141) |                 | 4C (n=74) |                 | RA/AAA (n=79) |                 | C (n=237) |
|------------------------------------------------|-----------------|---------------|-------------|-----------------|-----------|-----------------|---------------|-----------------|-----------|
|                                                | Mean            | ATET          | Mean        | ATET            | Mean      | ATET            | Mean          | ATET            | Mean      |
| <i>Training</i>                                |                 |               |             |                 |           |                 |               |                 |           |
| Always attends trainings (dummy)               | 0.85            | 0.081* (0.05) | 0.89        | -0.05           | 0.82      | 0               | 0.95          | 0.087* (0.04)   | 0.82      |
| Always implements learned in trainings (dummy) | 0.85            | 0.04          | 0.9         | -0.07*** (0.03) | 0.93      | 0.04            | 0.94          | 0.23            | 0.87      |
| <i>Agricultural practices</i>                  |                 |               |             |                 |           |                 |               |                 |           |
| Prunes coffee plants (dummy)                   | 0.43            | 0.13** (0.06) | 0.44        | 0.16** (0.06)   | 0.31      | 0.04            | 0.53          | 0.27*** (0.07)  | 0.22      |
| Practices removing the stems (dummy)           | 0.74            | -0.03         | 0.67        | 0.01            | 0.65      | -0.05           | 0.71          | 0.74            | 0.71      |
| Implements insect control (dummy)              | 0.86            | -0.02         | 0.89        | 0               | 0.74      | -0.11* (0.06)   | 0.97          | 0.1** (0.04)    | 0.85      |
| Utilises disease control (dummy)               | 0.11            | -0.05         | 0.18        | 0.06            | 0.55      | 0.43*** (0.06)  | 0.01          | -0.21*** (0.04) | 0.18      |
| Access to soil analysis (dummy)                | 0.12            | -0.04         | 0.23        | 0.06            | 0.27      | 0.18*** (0.06)  | 0.30          | 0.15** (0.06)   | 0.14      |
| Input fertilisers per hectare                  | 466.26          | -81.17        | 450.94      | -3.39           | 533.83    | 108.83* (58.58) | 367.11        | -90.22* (46.80) | 479.59    |
| <i>Record keeping &amp; knowledge</i>          |                 |               |             |                 |           |                 |               |                 |           |
| Record keeping (dummy)                         | 0.43            | 0.13* (0.07)  | 0.44        | 0.033           | 0.33      | 0.05            | 0.48          | 0.18** (0.07)   | 0.30      |
| Spend 5+ hours in record keeping (dummy)       | 0.05            | -0.05         | 0.03        | -0.03           | 0         | -0.06* (0.03)   | 0.05          | -0.02           | 0.04      |

Notes: \*\*\*p < 0.01; \*\*p < 0.05; \*p < 0.1. Robust standard errors displayed in parenthesis for significant coefficients.
