# Supplementary material
Source: publisher figshare collection journal article supplement (https://tandf.figshare.com/articles/dataset/_/8848808)
Supplement: Supplementary file 3 [file 1 › fjds_a_1632433_sm0680.pdf]

Appendix A. *Production of standard-compliant coffee (in metric tons)*

| <b>VSS</b>                                       | <b>UTZ<br/>(2015)</b> | <b>Rainforest<br/>Alliance/SAN<br/>(2015)</b> | <b>Fairtrade<br/>Intl.<br/>(2015)</b> | <b>Nespresso<br/>(2012)</b> | <b>Starbucks<br/>C.A.F.E.<br/>Practices<br/>(2012)</b> | <b>4C<br/>(2015)</b> | <b>Organic<br/>(2015)</b> |
|--------------------------------------------------|-----------------------|-----------------------------------------------|---------------------------------------|-----------------------------|--------------------------------------------------------|----------------------|---------------------------|
| <b>Production volume</b>                         | 821,399               | 522,000                                       | 561,000                               | 247,114                     | 457,339                                                | 2,629,339            | 342,000                   |
| <b>Percent of total<br/>certified production</b> | 14.7                  | 9.3                                           | 10                                    | 4.4                         | 8.2                                                    | 47.1                 | 6.1                       |
| <b>Total production<br/>volume</b>               | 5,584,591             |                                               |                                       |                             |                                                        |                      |                           |

*Source:* Lernoud et al. (2015); Lernoud et al. (2017); Dietz et al., (2018).
