# Supplementary material
Source: publisher figshare collection journal article supplement (https://tandf.figshare.com/articles/dataset/_/8848808)

## Appendix E

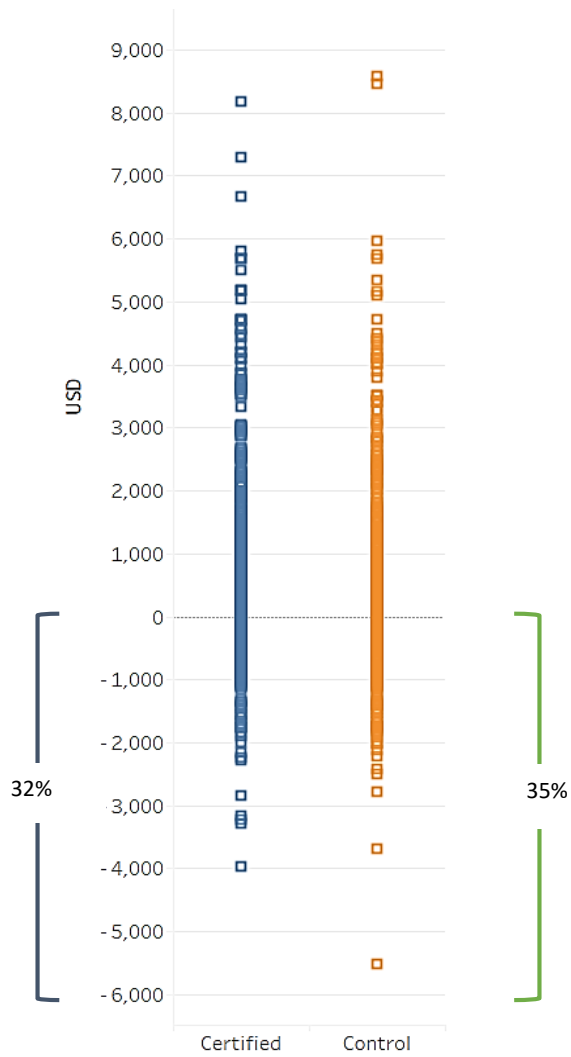

Figure 1. *Gross profits sample (2015)*

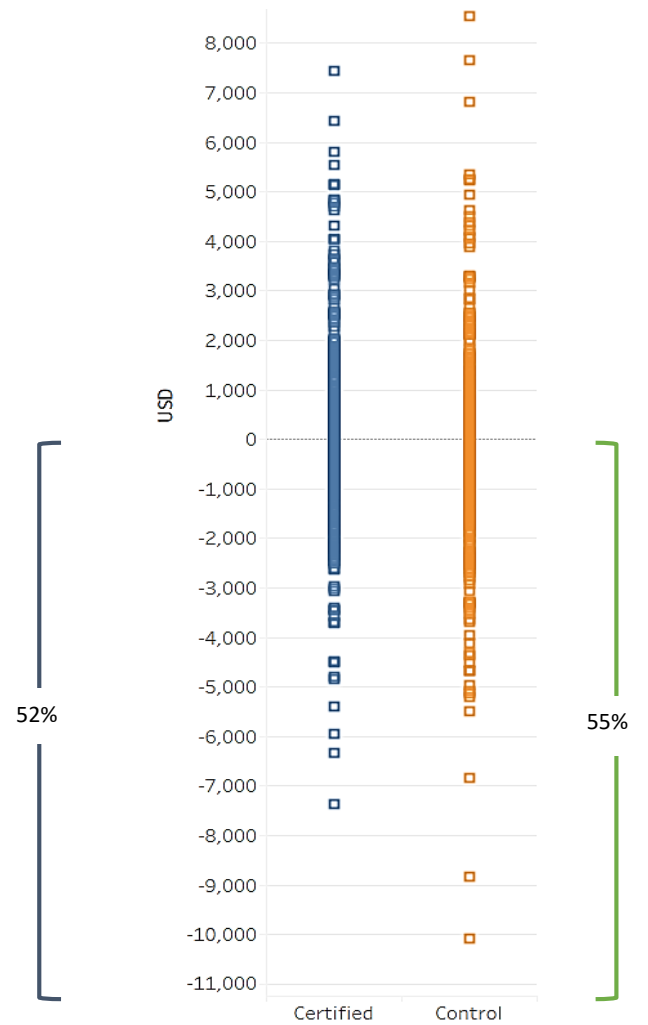

Figure 2. *Gross profits sample (2015) with unpaid labor*

Supplement: Supplementary file 3 [file 1 › fjds_a_1632433_sm0658.pdf]
